# Supplementary material for: Toenail selenium status and the risk of Barrett’s esophagus: the Netherlands Cohort Study
Source: Springer Nature journal article supplement (doi:10.1007/s10552-010-9651-1), 2010-10-10
Supplement: MOESM1 [file 8850106]

Online Supporting Material

| **Supplemental Table 1.** Association a Between Toenail Selenium Levels and Risk of Barrett's Esophagus Stratified by Cigarette Smoking Status, Body Mass Index and Intake Levels of Antioxidants; Netherlands Cohort Study (1986-2002, n = 120,852) | | | | | | | | | | | | |
| --- | --- | --- | --- | --- | --- | --- | --- | --- | --- | --- | --- | --- |
|  | **Subcohort** | |  | **Barrett's esophagus** | | | | | | | | |
|  |  | |  | **SIM** | | | |  | **SIM or unknown metaplasia** | | | |
|  | person time at risk (years) | |  | no.  cases | RR b | 95% CI | |  | no. cases | RR b | 95% CI | |
| **Cigarette smoking status** | | |  |  |  |  |  |  |  |  |  |  |
| Never smoker | | 10157 |  | 77 | 0.98 | 0.87, | 1.10 |  | 108 | 0.95 | 0.86, | 1.05 |
| Former smoker | | 9358 |  | 128 | 1.00 | 0.92, | 1.08 |  | 165 | 1.00 | 0.93, | 1.08 |
| Current smoker | | 6389 |  | 48 | 1.07 | 0.88, | 1.29 |  | 73 | 1.14 | 0.91, | 1.43 |
|  | |  |  | *P* interaction c | | 0.78 |  |  | *P* interaction | | 0.35 |  |
| **Body mass index (kg/m²)** | | |  |  |  |  |  |  |  |  |  |  |
| < 25 | | 13930 |  | 131 | 1.01 | 0.96, | 1.07 |  | 178 | 1.01 | 0.95, | 1.06 |
| ≥ 25 | | 11973 |  | 122 | 0.96 | 0.83, | 1.10 |  | 168 | 0.99 | 0.86, | 1.14 |
|  | |  |  | *P* interaction | | 0.73 |  |  | *P* interaction | | 0.79 |  |
| **Antioxidant intake** | |  |  |  |  |  |  |  |  |  |  |  |
| Vitamin C intake (mg/d) | | |  |  |  |  |  |  |  |  |  |  |
| low (≤ 97) | | 12700 |  | 139 | 1.01 | 0.95, | 1.09 |  | 189 | 1.01 | 0.94, | 1.07 |
| high (> 97) | | 13204 |  | 114 | 0.99 | 0.90, | 1.08 |  | 157 | 1.01 | 0.91, | 1.12 |
|  | |  |  | *P* interaction | | 0.76 |  |  | *P* interaction | | 0.90 |  |
| Vitamin E intake (mg/d) | | |  |  |  |  |  |  |  |  |  |  |
| low (≤ 12) | | 12901 |  | 113 | 1.01 | 0.90, | 1.13 |  | 166 | 1.06 | 0.95, | 1.19 |
| high (> 12) | | 13002 |  | 140 | 0.99 | 0.92, | 1.07 |  | 180 | 0.96 | 0.89, | 1.04 |
|  | |  |  | *P* interaction | | 0.78 |  |  | *P* interaction | | 0.16 |  |
| α-carotene intake (µg/d) | | |  |  |  |  |  |  |  |  |  |  |
| low (≤ 573) | | 12708 |  | 132 | 1.04 | 0.93, | 1.16 |  | 183 | 1.03 | 0.94, | 1.14 |
| high (> 573) | | 13195 |  | 121 | 0.97 | 0.89, | 1.06 |  | 163 | 0.99 | 0.90, | 1.08 |
|  | |  |  | *P* interaction | | 0.37 |  |  | *P* interaction | | 0.46 |  |
| β-carotene intake (µg/d) | | |  |  |  |  |  |  |  |  |  |  |
| low (≤ 2680) | | 12817 |  | 139 | 1.01 | 0.95, | 1.08 |  | 196 | 1.01 | 0.95, | 1.07 |
| high (> 2680) | | 13086 |  | 114 | 0.97 | 0.88, | 1.08 |  | 150 | 1.00 | 0.88, | 1.12 |
|  | |  |  | *P* interaction | | 0.62 |  |  | *P* interaction | | 0.78 |  |
| β-cryptoxanthin intake (µg/d) | | |  |  |  |  |  |  |  |  |  |  |
| low (≤ 130) | | 12669 |  | 129 | 1.01 | 0.91, | 1.13 |  | 176 | 1.03 | 0.92, | 1.15 |
| high (> 130) | | 13234 |  | 124 | 0.99 | 0.92, | 1.07 |  | 170 | 0.99 | 0.92, | 1.06 |
|  | |  |  | *P* interaction | | 0.60 |  |  | *P* interaction | | 0.48 |  |
| Lycopene intake (µg/d) | |  |  |  |  |  |  |  |  |  |  |  |
| low (≤ 823) | | 12857 |  | 141 | 0.98 | 0.89, | 1.07 |  | 203 | 0.96 | 0.89, | 1.04 |
| high (> 823) | | 13046 |  | 112 | 1.04 | 0.94, | 1.14 |  | 143 | 1.08 | 0.97, | 1.20 |
|  | |  |  | *P* interaction | | 0.46 |  |  | *P* interaction | | 0.13 |  |
| Lutein/Zeaxanthin intake (µg/d) | | |  |  |  |  |  |  |  |  |  |  |
| low (≤ 2360) | | 12876 |  | 146 | 1.00 | 0.92, | 1.08 |  | 198 | 0.99 | 0.92, | 1.07 |
| high (> 2360) | | 13027 |  | 107 | 1.01 | 0.91, | 1.12 |  | 148 | 1.02 | 0.92, | 1.14 |
|  | |  |  | *P* interaction | | 0.66 |  |  | *P* interaction | | 0.60 |  |
| a adjusted for age (years), sex, cigarette smoking (current smoking status (yes/no), frequency (number of cigarettes/day), and duration (years)), alcohol consumption (g/day), body mass index (kg/m²), if applicable. | | | | | | | | | | | | |
| b RR per 0.06 µg/g increment of toenail selenium. This increment is equal to the average size of the two central quartiles. | | | | | | | | | | | | |
| c p-value for interaction between sex and toenail selenium level, based on cross product term in the Cox proportional hazard model. | | | | | | | | | | | | |
